# Supplementary material
Source: HighWire-hosted journal article supplement (https://bmjopen.bmj.com/content/14/9/e082167)
Supplement: inline-supplementary-material-1 [file inline-supplementary-material-1.pdf]

PHC Health Provider Survey Questionnaire

| GENERAL HEALTH WORKER INFORMATION |                                  |                                                                                                                                                                                                                                                                                                                                                                                                                                                               |
|-----------------------------------|----------------------------------|---------------------------------------------------------------------------------------------------------------------------------------------------------------------------------------------------------------------------------------------------------------------------------------------------------------------------------------------------------------------------------------------------------------------------------------------------------------|
| 1                                 | Gender Of The Health Worker      | <div><input type="radio"/> Male</div> <div><input type="radio"/> Female</div>                                                                                                                                                                                                                                                                                                                                                                                 |
| 2                                 | Designation of the health worker | <div><input type="radio"/> Medical Officer</div> <div><input type="radio"/> Specialist</div>                                                                                                                                                                                                                                                                                                                                                                  |
| 3                                 | Highest level of Education       | <div><input type="radio"/> Bachelor's Degree</div> <div><input type="radio"/> Master's Degree</div> <div><input type="radio"/> Doctorate Degree</div> <div><input type="radio"/> Other (please specify) _____</div>                                                                                                                                                                                                                                           |
| 4                                 | Years of Experience              | <div><input type="radio"/> Less than 1 year</div> <div><input type="radio"/> 1-5 years</div> <div><input type="radio"/> 6-10 years</div> <div><input type="radio"/> 11-15 years</div> <div><input type="radio"/> 16-20 years</div> <div><input type="radio"/> More than 20 years</div>                                                                                                                                                                        |
| 5                                 | Primary area of Expertise        | <div><input type="radio"/> Primary healthcare</div> <div><input type="radio"/> Maternal and child health</div> <div><input type="radio"/> Infectious diseases (e.g., HIV/AIDS, malaria, tuberculosis)</div> <div><input type="radio"/> Chronic diseases (e.g., diabetes, hypertension)</div> <div><input type="radio"/> Mental health</div> <div><input type="radio"/> Emergency medicine</div> <div><input type="radio"/> Other (please specify) _____</div> |
| 6                                 | District                         |                                                                                                                                                                                                                                                                                                                                                                                                                                                               |

Respected healthcare provider, Your input on the usage and effects of digital decision support systems in tele-clinic practice is crucial - please take part in our survey to share your valuable feedback.

## DDSS utilization pattern

1. Do you currently use a digital decision support system (DDSS) in your tele-clinic practice?

|                                          |                                                |
|------------------------------------------|------------------------------------------------|
| <input type="radio"/> Yes, I use a DDSS. | <input type="radio"/> No, I do not use a DDSS. |
|------------------------------------------|------------------------------------------------|

2. How frequently do you use the DDSS in your tele-clinic practice?

|                                            |                                            |                                           |                                       |
|--------------------------------------------|--------------------------------------------|-------------------------------------------|---------------------------------------|
| <input type="radio"/> Multiple times a day | <input type="radio"/> Several times a week | <input type="radio"/> Once a week or less | <input type="radio"/> Rarely or never |
|--------------------------------------------|--------------------------------------------|-------------------------------------------|---------------------------------------|

3. How do you make decisions in your tele-clinic practice?

|                                                                                 |                                                                                      |                                                                                   |                                                  |
|---------------------------------------------------------------------------------|--------------------------------------------------------------------------------------|-----------------------------------------------------------------------------------|--------------------------------------------------|
| <input type="radio"/> I rely on the DDSS for diagnosis and treatment decisions. | <input type="radio"/> I rely on my clinical experience and knowledge without a DDSS. | <input type="radio"/> I use a combination of the DDSS and my clinical experience. | <input type="radio"/> N/A - I do not use a DDSS. |
|---------------------------------------------------------------------------------|--------------------------------------------------------------------------------------|-----------------------------------------------------------------------------------|--------------------------------------------------|

4. What factors influence your decision to use the digital decision support system (DDSS) in your tele-clinic practice?

|                                                                                                 |                                                                                                     |                                                                                          |                                                                             |
|-------------------------------------------------------------------------------------------------|-----------------------------------------------------------------------------------------------------|------------------------------------------------------------------------------------------|-----------------------------------------------------------------------------|
| <input type="radio"/> The complexity of the case and the potential benefits of using the DDSS.. | <input type="radio"/> Time constraints and the availability of alternative decision-making methods. | <input type="radio"/> Recommendations from colleagues or other healthcare professionals. | <input type="radio"/> N/A - I do not use a digital decision support system. |
|-------------------------------------------------------------------------------------------------|-----------------------------------------------------------------------------------------------------|------------------------------------------------------------------------------------------|-----------------------------------------------------------------------------|

5. How confident are you in the accuracy and reliability of the digital decision support system (DDSS) you use?

|                                                                                           |                                                                                   |                                                                             |                                                                                               |
|-------------------------------------------------------------------------------------------|-----------------------------------------------------------------------------------|-----------------------------------------------------------------------------|-----------------------------------------------------------------------------------------------|
| <input type="radio"/> Very confident, it consistently provides accurate recommendations.. | <input type="radio"/> Confident, it generally provides accurate recommendations.. | <input type="radio"/> Neutral, I have mixed experiences with its accuracy.. | <input type="radio"/> Not confident, I have encountered inaccuracies in its recommendations.. |
|-------------------------------------------------------------------------------------------|-----------------------------------------------------------------------------------|-----------------------------------------------------------------------------|-----------------------------------------------------------------------------------------------|

## Social Influence

1. Have you received positive feedback or recommendations from colleagues regarding the use of DDSS?

|                                                                               |                                                                                    |                                                                                |                                                  |
|-------------------------------------------------------------------------------|------------------------------------------------------------------------------------|--------------------------------------------------------------------------------|--------------------------------------------------|
| <input type="radio"/> Yes, many colleagues have praised the benefits of DDSS. | <input type="radio"/> Yes, a few colleagues have mentioned the advantages of DDSS. | <input type="radio"/> No, I have not received any feedback or recommendations. | <input type="radio"/> N/A - I do not use a DDSS. |
|-------------------------------------------------------------------------------|------------------------------------------------------------------------------------|--------------------------------------------------------------------------------|--------------------------------------------------|

2. How much influence do colleagues have on your decision to use or not use a DDSS?

|                                                                            |                                                                              |                                                                                    |                                                 |
|----------------------------------------------------------------------------|------------------------------------------------------------------------------|------------------------------------------------------------------------------------|-------------------------------------------------|
| <input type="radio"/> High, there is significant pressure to use the DDSS. | <input type="radio"/> Moderate, there are some expectations to use the DDSS. | <input type="radio"/> Low, there is minimal pressure or influence to use the DDSS. | <input type="radio"/> N/A - I do not use a DDSS |
|----------------------------------------------------------------------------|------------------------------------------------------------------------------|------------------------------------------------------------------------------------|-------------------------------------------------|

## 3. How inclined are you to recommend the DDSS to other healthcare professionals?

|                                                                                                                |                                                                                                             |                                                                                                        |                                                                                                             |
|----------------------------------------------------------------------------------------------------------------|-------------------------------------------------------------------------------------------------------------|--------------------------------------------------------------------------------------------------------|-------------------------------------------------------------------------------------------------------------|
| <input type="radio"/> Highly inclined, I believe other professionals would benefit greatly from using the DDSS | <input type="radio"/> Moderately inclined, I would recommend the DDSS based on specific situations or needs | <input type="radio"/> Somewhat disinclined, I have reservations about recommending the DDSS to others. | <input type="radio"/> Highly disinclined, I would not recommend the use of the DDSS to other professionals. |
|----------------------------------------------------------------------------------------------------------------|-------------------------------------------------------------------------------------------------------------|--------------------------------------------------------------------------------------------------------|-------------------------------------------------------------------------------------------------------------|

**Facilitating Conditions**

## 1. How accessible is the DDSS in your tele-clinic practice?

|                                                                                        |                                                                                          |                                                                                                  |                                                                       |
|----------------------------------------------------------------------------------------|------------------------------------------------------------------------------------------|--------------------------------------------------------------------------------------------------|-----------------------------------------------------------------------|
| <input type="radio"/> Highly accessible, I can easily access the DDSS whenever needed. | <input type="radio"/> Moderately accessible, there may be some minor barriers to access. | <input type="radio"/> Somewhat accessible, there are significant barriers to accessing the DDSS. | <input type="radio"/> Not accessible, I do not have access to a DDSS. |
|----------------------------------------------------------------------------------------|------------------------------------------------------------------------------------------|--------------------------------------------------------------------------------------------------|-----------------------------------------------------------------------|

## 2. Are there any organizational policies or guidelines that promote the use of DDSS in your tele-clinic practice?

|                                                                                       |                                                                                                    |                                                                                            |                                                  |
|---------------------------------------------------------------------------------------|----------------------------------------------------------------------------------------------------|--------------------------------------------------------------------------------------------|--------------------------------------------------|
| <input type="radio"/> Yes, there are specific policies that promote DDSS utilization. | <input type="radio"/> There are general guidelines, but they do not specifically promote DDSS use. | <input type="radio"/> No, there are no policies or guidelines related to DDSS utilization. | <input type="radio"/> N/A - I do not use a DDSS. |
|---------------------------------------------------------------------------------------|----------------------------------------------------------------------------------------------------|--------------------------------------------------------------------------------------------|--------------------------------------------------|

## 3. How do you perceive the level of support and training provided for the digital decision support system or DDSS?

|                                                                                                     |                                                                                           |                                                                                   |                                                                                          |
|-----------------------------------------------------------------------------------------------------|-------------------------------------------------------------------------------------------|-----------------------------------------------------------------------------------|------------------------------------------------------------------------------------------|
| <input type="radio"/> Excellent, the support and training resources are comprehensive and effective | <input type="radio"/> Good, the support and training resources are helpful and sufficient | <input type="radio"/> Fair, the support and training resources could be improved. | <input type="radio"/> Poor, the support and training resources are inadequate or lacking |
|-----------------------------------------------------------------------------------------------------|-------------------------------------------------------------------------------------------|-----------------------------------------------------------------------------------|------------------------------------------------------------------------------------------|

## 4. In your experience, how often do you encounter technical issues or glitches while using the digital health system or DDSS?

|                                                                       |                                                                                  |                                                                                         |                                                                          |
|-----------------------------------------------------------------------|----------------------------------------------------------------------------------|-----------------------------------------------------------------------------------------|--------------------------------------------------------------------------|
| <input type="radio"/> Rarely or never, technical issues are minimal.. | <input type="radio"/> Occasionally, there are some technical issues or glitches. | <input type="radio"/> Frequently, technical issues or glitches are a common occurrence. | <input type="radio"/> N/A - I do not use a digital health system or DDSS |
|-----------------------------------------------------------------------|----------------------------------------------------------------------------------|-----------------------------------------------------------------------------------------|--------------------------------------------------------------------------|

## 5. How responsive is the technical support team in resolving any technical issues or inquiries related to the digital health system or DDSS?

|                                                                                  |                                                                              |                                                                                 |                                                                               |
|----------------------------------------------------------------------------------|------------------------------------------------------------------------------|---------------------------------------------------------------------------------|-------------------------------------------------------------------------------|
| <input type="radio"/> Very responsive, they promptly address and resolve issues. | <input type="radio"/> Responsive, they generally provide timely assistance.. | <input type="radio"/> Neutral, the responsiveness varies depending on the issue | <input type="radio"/> Not responsive, it takes a long time to receive support |
|----------------------------------------------------------------------------------|------------------------------------------------------------------------------|---------------------------------------------------------------------------------|-------------------------------------------------------------------------------|

Users Behavioral Intentions towards DDSS

1. How likely are you to continue using the DDSS in your tele-clinic practice in the future?

|                                                                                       |                                                                                                             |                                                                                              |                                                                                   |
|---------------------------------------------------------------------------------------|-------------------------------------------------------------------------------------------------------------|----------------------------------------------------------------------------------------------|-----------------------------------------------------------------------------------|
| <input type="radio"/> Highly likely, I see great value in continuing to use the DDSS. | <input type="radio"/> Moderately likely, I would consider using the DDSS depending on future circumstances. | <input type="radio"/> Somewhat unlikely, I am uncertain about the long-term use of the DDSS. | <input type="radio"/> Highly unlikely, I plan to discontinue the use of the DDSS. |
|---------------------------------------------------------------------------------------|-------------------------------------------------------------------------------------------------------------|----------------------------------------------------------------------------------------------|-----------------------------------------------------------------------------------|

2. How would you rate the overall impact of the digital health system or DDSS on the quality of patient-provider interactions in your tele-clinic practice?

|                                                                                     |                                                                                         |                                                                                                 |                                                                                               |
|-------------------------------------------------------------------------------------|-----------------------------------------------------------------------------------------|-------------------------------------------------------------------------------------------------|-----------------------------------------------------------------------------------------------|
| <input type="radio"/> Very positive, it has enhanced patient-provider interactions. | <input type="radio"/> Positive, it has somewhat improved patient-provider interactions. | <input type="radio"/> Neutral, the impact on patient-provider interactions is unclear or mixed. | <input type="radio"/> Negative, it has had a negative impact on patient-provider interactions |
|-------------------------------------------------------------------------------------|-----------------------------------------------------------------------------------------|-------------------------------------------------------------------------------------------------|-----------------------------------------------------------------------------------------------|

3. How well does DDSS support adherence to specific patient management guidelines/protocols?

|                                                                                           |                                                                                             |                                                                                                          |                                                                                                 |
|-------------------------------------------------------------------------------------------|---------------------------------------------------------------------------------------------|----------------------------------------------------------------------------------------------------------|-------------------------------------------------------------------------------------------------|
| <input type="radio"/> Very well, it helps me adhere to guidelines/protocols consistently. | <input type="radio"/> Well, it assists me in following guidelines/protocols to some extent. | <input type="radio"/> Moderately, there are limitations in supporting adherence to guidelines/protocols. | <input type="radio"/> Poorly, it does not effectively support adherence to guidelines/protocols |
|-------------------------------------------------------------------------------------------|---------------------------------------------------------------------------------------------|----------------------------------------------------------------------------------------------------------|-------------------------------------------------------------------------------------------------|

4. How would you rate the effectiveness of the digital health system or DDSS in facilitating timely communication and information exchange with other healthcare providers?

|                                                                                                  |                                                                                                          |                                                                                                                                  |                                                                                       |
|--------------------------------------------------------------------------------------------------|----------------------------------------------------------------------------------------------------------|----------------------------------------------------------------------------------------------------------------------------------|---------------------------------------------------------------------------------------|
| <input type="radio"/> Very effective, it enables seamless communication and information exchange | <input type="radio"/> Effective, it generally facilitates timely communication and information exchange. | <input type="radio"/> Moderately effective, there are occasional delays or challenges in communication and information exchange. | <input type="radio"/> Ineffective, it hinders communication and information exchange. |
|--------------------------------------------------------------------------------------------------|----------------------------------------------------------------------------------------------------------|----------------------------------------------------------------------------------------------------------------------------------|---------------------------------------------------------------------------------------|

User Satisfaction with DDSS

1. How satisfied are you with the overall user interface and usability of the DDSS?

|                                                                          |                                                                            |                                                                                              |                                                                            |
|--------------------------------------------------------------------------|----------------------------------------------------------------------------|----------------------------------------------------------------------------------------------|----------------------------------------------------------------------------|
| <input type="radio"/> Very satisfied, it is intuitive and user-friendly. | <input type="radio"/> Satisfied, it is generally easy to navigate and use. | <input type="radio"/> Neutral, I have mixed feelings about its user interface and usability. | <input type="radio"/> Dissatisfied, it is challenging to use and navigate. |
|--------------------------------------------------------------------------|----------------------------------------------------------------------------|----------------------------------------------------------------------------------------------|----------------------------------------------------------------------------|

2. How satisfied are you with the outcomes and impact of the DDSS in your tele-clinic practice?

|                                                                                                |                                                                                                      |                                                                                             |                                                                                                       |
|------------------------------------------------------------------------------------------------|------------------------------------------------------------------------------------------------------|---------------------------------------------------------------------------------------------|-------------------------------------------------------------------------------------------------------|
| <input type="radio"/> Very satisfied, it has significantly improved patient care and outcomes. | <input type="radio"/> Satisfied, it has positively impacted patient care and outcomes to some extent | <input type="radio"/> Neutral, the impact on patient care and outcomes is unclear or mixed. | <input type="radio"/> Dissatisfied, it has not had a meaningful impact on patient care and outcomes.. |
|------------------------------------------------------------------------------------------------|------------------------------------------------------------------------------------------------------|---------------------------------------------------------------------------------------------|-------------------------------------------------------------------------------------------------------|

Ease of Use

1. How easy is it for you to navigate and find the necessary information within the DDSS?

|                                                                                          |                                                                                    |                                                                                                           |                                                                                                         |
|------------------------------------------------------------------------------------------|------------------------------------------------------------------------------------|-----------------------------------------------------------------------------------------------------------|---------------------------------------------------------------------------------------------------------|
| <input type="radio"/> Very easy, the system is well-organized and intuitive to navigate. | <input type="radio"/> Easy, I can find the information I need with minimal effort. | <input type="radio"/> Moderately difficult, it takes some time and effort to locate specific information. | <input type="radio"/> Very difficult, the system's navigation and information retrieval are challenging |
|------------------------------------------------------------------------------------------|------------------------------------------------------------------------------------|-----------------------------------------------------------------------------------------------------------|---------------------------------------------------------------------------------------------------------|

2. How clear and understandable are the recommendations provided by the DDSS?

|                                                                                                               |                                                                                     |                                                                                                                     |                                                                                                         |
|---------------------------------------------------------------------------------------------------------------|-------------------------------------------------------------------------------------|---------------------------------------------------------------------------------------------------------------------|---------------------------------------------------------------------------------------------------------|
| <input type="radio"/> Very clear and understandable, the recommendations are easy to interpret and implement. | <input type="radio"/> Clear, I can comprehend the recommendations with some effort. | <input type="radio"/> Moderately unclear, there are instances where the recommendations are ambiguous or confusing. | <input type="radio"/> Very unclear, the recommendations are often difficult to understand or interpret. |
|---------------------------------------------------------------------------------------------------------------|-------------------------------------------------------------------------------------|---------------------------------------------------------------------------------------------------------------------|---------------------------------------------------------------------------------------------------------|

3. How well does the DDSS integrate with other existing technologies and systems in your tele-clinic practice?

|                                                                                                |                                                                                                    |                                                                                            |                                                                                              |
|------------------------------------------------------------------------------------------------|----------------------------------------------------------------------------------------------------|--------------------------------------------------------------------------------------------|----------------------------------------------------------------------------------------------|
| <input type="radio"/> Very well, it seamlessly integrates with other technologies and systems. | <input type="radio"/> Well, it generally integrates smoothly, but there are occasional challenges. | <input type="radio"/> Moderately, there are some integration issues that need improvement. | <input type="radio"/> Poorly, it does not integrate well with other technologies and systems |
|------------------------------------------------------------------------------------------------|----------------------------------------------------------------------------------------------------|--------------------------------------------------------------------------------------------|----------------------------------------------------------------------------------------------|

Accuracy And Completeness Of Disease Protocol

1. Does the protocol align with established international clinical guidelines?

|                                                                                                          |                                                                                                         |                                                                                                           |                                                                                                                          |
|----------------------------------------------------------------------------------------------------------|---------------------------------------------------------------------------------------------------------|-----------------------------------------------------------------------------------------------------------|--------------------------------------------------------------------------------------------------------------------------|
| <input type="radio"/> Yes, the protocol closely adheres to recognized international clinical guidelines. | <input type="radio"/> The protocol partially aligns with established international clinical guidelines. | <input type="radio"/> No, the protocol does not align with established international clinical guidelines. | <input type="radio"/> I am unsure about the alignment of the protocol with established international clinical guidelines |
|----------------------------------------------------------------------------------------------------------|---------------------------------------------------------------------------------------------------------|-----------------------------------------------------------------------------------------------------------|--------------------------------------------------------------------------------------------------------------------------|

## 2. Does the protocol include a comprehensive diagnostic plan for the disease?

|                                                                                                                                                                          |                                                                                                                                                                                          |                                                                                                                                                                                                    |                                                                                                                                          |
|--------------------------------------------------------------------------------------------------------------------------------------------------------------------------|------------------------------------------------------------------------------------------------------------------------------------------------------------------------------------------|----------------------------------------------------------------------------------------------------------------------------------------------------------------------------------------------------|------------------------------------------------------------------------------------------------------------------------------------------|
| <input type="radio"/> Yes, the protocol provides a detailed diagnostic plan that outlines the necessary tests, assessments, and criteria for accurate disease diagnosis. | <input type="radio"/> The protocol partially covers the diagnostic plan, but additional information or specific guidelines may be needed to ensure a thorough and standardized approach. | <input type="radio"/> No, the protocol does not adequately address the diagnostic plan, potentially leaving healthcare providers without clear guidance on how to establish an accurate diagnosis. | <input type="radio"/> I am unsure about the coverage of the diagnostic plan in the protocol without further examination of its contents. |
|--------------------------------------------------------------------------------------------------------------------------------------------------------------------------|------------------------------------------------------------------------------------------------------------------------------------------------------------------------------------------|----------------------------------------------------------------------------------------------------------------------------------------------------------------------------------------------------|------------------------------------------------------------------------------------------------------------------------------------------|

## 3. Does the protocol outline a well-defined treatment plan for the disease?

|                                                                                                                                                                                                            |                                                                                                                                                                                   |                                                                                                                                                                                   |                                                                                                                                     |
|------------------------------------------------------------------------------------------------------------------------------------------------------------------------------------------------------------|-----------------------------------------------------------------------------------------------------------------------------------------------------------------------------------|-----------------------------------------------------------------------------------------------------------------------------------------------------------------------------------|-------------------------------------------------------------------------------------------------------------------------------------|
| <input type="radio"/> Yes, the protocol provides a comprehensive treatment plan that encompasses evidence-based therapies, interventions, and medications tailored to the disease and patient's condition. | <input type="radio"/> The protocol outlines some aspects of the treatment plan, but further information or specific recommendations may be required for a comprehensive approach. | <input type="radio"/> No, the protocol lacks a comprehensive treatment plan, which may hinder healthcare providers in delivering effective and appropriate treatment to patients. | <input type="radio"/> I am unsure about the inclusion of a treatment plan in the protocol without a detailed review of its content. |
|------------------------------------------------------------------------------------------------------------------------------------------------------------------------------------------------------------|-----------------------------------------------------------------------------------------------------------------------------------------------------------------------------------|-----------------------------------------------------------------------------------------------------------------------------------------------------------------------------------|-------------------------------------------------------------------------------------------------------------------------------------|

## 4. Does the protocol cover various aspects of disease management, including monitoring, follow-up care, and lifestyle modifications?

|                                                                                                                                                                                                    |                                                                                                                                                                                               |                                                                                                                                                                                                        |                                                                                                                                              |
|----------------------------------------------------------------------------------------------------------------------------------------------------------------------------------------------------|-----------------------------------------------------------------------------------------------------------------------------------------------------------------------------------------------|--------------------------------------------------------------------------------------------------------------------------------------------------------------------------------------------------------|----------------------------------------------------------------------------------------------------------------------------------------------|
| <input type="radio"/> Yes, the protocol covers various aspects of disease management, providing guidance on monitoring, follow-up care, and lifestyle modifications for patients with the disease. | <input type="radio"/> The protocol addresses some aspects of disease management, but additional information or guidelines may be necessary for a more thorough and effective management plan. | <input type="radio"/> No, the protocol does not adequately address disease management, potentially leaving healthcare providers without clear instructions on long-term care and support for patients. | <input type="radio"/> I am unsure about the coverage of disease management in the protocol without a comprehensive analysis of its contents. |
|----------------------------------------------------------------------------------------------------------------------------------------------------------------------------------------------------|-----------------------------------------------------------------------------------------------------------------------------------------------------------------------------------------------|--------------------------------------------------------------------------------------------------------------------------------------------------------------------------------------------------------|----------------------------------------------------------------------------------------------------------------------------------------------|

## 5. Does the protocol include information on risk factors for the disease?

|                                                                                                        |                                                                                                                          |                                                                                                      |                                                                                                   |
|--------------------------------------------------------------------------------------------------------|--------------------------------------------------------------------------------------------------------------------------|------------------------------------------------------------------------------------------------------|---------------------------------------------------------------------------------------------------|
| <input type="radio"/> Yes, the protocol provides detailed information on risk factors for the disease. | <input type="radio"/> The protocol mentions some risk factors for the disease, but additional information may be needed. | <input type="radio"/> No, the protocol does not include information on risk factors for the disease. | <input type="radio"/> I am unsure about the inclusion of risk factor information in the protocol. |
|--------------------------------------------------------------------------------------------------------|--------------------------------------------------------------------------------------------------------------------------|------------------------------------------------------------------------------------------------------|---------------------------------------------------------------------------------------------------|

## 6. Does the protocol offer guidance on the management of symptoms and potential complications associated with the disease?

|                                                                                                                   |                                                                                                                                               |                                                                                                                               |                                                                                                                                        |
|-------------------------------------------------------------------------------------------------------------------|-----------------------------------------------------------------------------------------------------------------------------------------------|-------------------------------------------------------------------------------------------------------------------------------|----------------------------------------------------------------------------------------------------------------------------------------|
| <input type="radio"/> Yes, the protocol provides clear guidance on managing symptoms and potential complications. | <input type="radio"/> The protocol offers some guidance on managing symptoms and potential complications, but more details could be included. | <input type="radio"/> No, the protocol does not provide sufficient guidance on managing symptoms and potential complications. | <input type="radio"/> I am unsure about the guidance offered in the protocol regarding symptom management and potential complications. |
|-------------------------------------------------------------------------------------------------------------------|-----------------------------------------------------------------------------------------------------------------------------------------------|-------------------------------------------------------------------------------------------------------------------------------|----------------------------------------------------------------------------------------------------------------------------------------|

7. Does the protocol consider the specific needs of different patient populations, such as children, pregnant women, or older adults?

|                                                                                                          |                                                                                                         |                                                                                                           |                                                                                                                           |
|----------------------------------------------------------------------------------------------------------|---------------------------------------------------------------------------------------------------------|-----------------------------------------------------------------------------------------------------------|---------------------------------------------------------------------------------------------------------------------------|
| <input type="radio"/> Yes, the protocol closely adheres to recognized international clinical guidelines. | <input type="radio"/> The protocol partially aligns with established international clinical guidelines. | <input type="radio"/> No, the protocol does not align with established international clinical guidelines. | <input type="radio"/> I am unsure about the alignment of the protocol with established international clinical guidelines. |
|----------------------------------------------------------------------------------------------------------|---------------------------------------------------------------------------------------------------------|-----------------------------------------------------------------------------------------------------------|---------------------------------------------------------------------------------------------------------------------------|

8. Does the protocol cover appropriate follow-up care and monitoring for patients with the disease?

|                                                                                                                                                                                                                               |                                                                                                                                                                      |                                                                                                                                                                                                      |                                                                                                                                                         |
|-------------------------------------------------------------------------------------------------------------------------------------------------------------------------------------------------------------------------------|----------------------------------------------------------------------------------------------------------------------------------------------------------------------|------------------------------------------------------------------------------------------------------------------------------------------------------------------------------------------------------|---------------------------------------------------------------------------------------------------------------------------------------------------------|
| <input type="radio"/> Yes, the protocol includes clear instructions for appropriate follow-up care and monitoring of patients with the disease, ensuring continuity of care and timely assessment of treatment effectiveness. | <input type="radio"/> The protocol partially covers follow-up care and monitoring, but it may lack specific details or frequency guidelines for patient evaluations. | <input type="radio"/> No, the protocol does not sufficiently address follow-up care and monitoring, potentially leaving healthcare providers without clear guidance on long-term patient management. | <input type="radio"/> I am unsure about the coverage of follow-up care and monitoring in the protocol without a comprehensive analysis of its contents. |
|-------------------------------------------------------------------------------------------------------------------------------------------------------------------------------------------------------------------------------|----------------------------------------------------------------------------------------------------------------------------------------------------------------------|------------------------------------------------------------------------------------------------------------------------------------------------------------------------------------------------------|---------------------------------------------------------------------------------------------------------------------------------------------------------|

9. Does the protocol provide recommendations for healthcare providers on reporting or notifying cases of the disease to public health authorities, if necessary?

|                                                                                                                                                                                                                                            |                                                                                                                                                                                                     |                                                                                                                                                                                                                |                                                                                                                                                                       |
|--------------------------------------------------------------------------------------------------------------------------------------------------------------------------------------------------------------------------------------------|-----------------------------------------------------------------------------------------------------------------------------------------------------------------------------------------------------|----------------------------------------------------------------------------------------------------------------------------------------------------------------------------------------------------------------|-----------------------------------------------------------------------------------------------------------------------------------------------------------------------|
| <input type="radio"/> Yes, the protocol offers clear recommendations for healthcare providers on reporting or notifying cases of the disease to public health authorities, ensuring appropriate disease surveillance and control measures. | <input type="radio"/> The protocol partially addresses reporting or notifying cases to public health authorities, but it may need more specific guidance on the reporting process and requirements. | <input type="radio"/> No, the protocol does not provide sufficient recommendations for reporting or notifying cases to public health authorities, potentially hindering timely and effective disease tracking. | <input type="radio"/> I am unsure about the presence of recommendations for reporting or notifying cases in the protocol without further examination of its contents. |
|--------------------------------------------------------------------------------------------------------------------------------------------------------------------------------------------------------------------------------------------|-----------------------------------------------------------------------------------------------------------------------------------------------------------------------------------------------------|----------------------------------------------------------------------------------------------------------------------------------------------------------------------------------------------------------------|-----------------------------------------------------------------------------------------------------------------------------------------------------------------------|

10. Does the protocol address any relevant legal or ethical considerations associated with the disease or its treatment?

|                                                                                                                                                                                                                      |                                                                                                                                                                                                     |                                                                                                                                                                                                     |                                                                                                                                                           |
|----------------------------------------------------------------------------------------------------------------------------------------------------------------------------------------------------------------------|-----------------------------------------------------------------------------------------------------------------------------------------------------------------------------------------------------|-----------------------------------------------------------------------------------------------------------------------------------------------------------------------------------------------------|-----------------------------------------------------------------------------------------------------------------------------------------------------------|
| <input type="radio"/> Yes, the protocol considers and addresses relevant legal and ethical considerations associated with the disease or its treatment, ensuring compliance with regulations and ethical principles. | <input type="radio"/> The protocol partially covers legal or ethical considerations, but additional information or specific guidelines may be necessary to address all relevant aspects adequately. | <input type="radio"/> No, the protocol does not adequately address legal or ethical considerations, potentially raising concerns about the appropriateness and legality of certain aspects of care. | <input type="radio"/> I am unsure about the coverage of legal or ethical considerations in the protocol without a comprehensive analysis of its contents. |
|----------------------------------------------------------------------------------------------------------------------------------------------------------------------------------------------------------------------|-----------------------------------------------------------------------------------------------------------------------------------------------------------------------------------------------------|-----------------------------------------------------------------------------------------------------------------------------------------------------------------------------------------------------|-----------------------------------------------------------------------------------------------------------------------------------------------------------|

11. Does the protocol reference additional resources or references for further information on the disease?

|                                                                                                                         |                                                                                                               |                                                                                                                    |                                                                                                                       |
|-------------------------------------------------------------------------------------------------------------------------|---------------------------------------------------------------------------------------------------------------|--------------------------------------------------------------------------------------------------------------------|-----------------------------------------------------------------------------------------------------------------------|
| <input type="radio"/> Yes, the protocol includes a comprehensive list of additional resources and references, providing | <input type="radio"/> The protocol references some additional resources or references, but more comprehensive | <input type="radio"/> No, the protocol does not reference additional resources or references, potentially limiting | <input type="radio"/> I am unsure about the inclusion of additional resources or references in the protocol without a |
|-------------------------------------------------------------------------------------------------------------------------|---------------------------------------------------------------------------------------------------------------|--------------------------------------------------------------------------------------------------------------------|-----------------------------------------------------------------------------------------------------------------------|

|                                                                                 |                                                                   |                                                                          |                                 |
|---------------------------------------------------------------------------------|-------------------------------------------------------------------|--------------------------------------------------------------------------|---------------------------------|
| healthcare providers with further information on the disease and its management | and diverse sources could enhance its credibility and usefulness. | healthcare providers' access to further information and expert insights. | detailed review of its content. |
|---------------------------------------------------------------------------------|-------------------------------------------------------------------|--------------------------------------------------------------------------|---------------------------------|

Thank you for taking the time to complete the questionnaire on the utilization and impact of digital decision support systems in tele-clinic practice - your insights are greatly appreciated!
