# Supplementary material
Source: HighWire-hosted journal article supplement (https://bmjopen.bmj.com/content/14/9/e082167)
Supplement: inline-supplementary-material-3 [file inline-supplementary-material-3.pdf]

Version 1.1

### **Part 1. INTERVIEW GUIDE FOR TELEMEDICINE POLICY MAKER**

Q1. What policies have you developed or implemented to improve telemedicine services in Pakistan?

Q2. What are the challenges you have faced in implementing these policies?

Q3. How do you involve stakeholders in the policy development process?

Q4. .How do you involve stakeholders in the policy development process?

Q5. How do you ensure that the policies are in line with current healthcare needs of the population?

Q6. How do you balance the competing demands of different stakeholders in policy development?

Q7. How do you ensure that policies are adequately funded and resourced?

Q8. How do you ensure that the policies are sustainable in the long term?

Q9. How do you evaluate the impact of policies on the telemedicine sector?

Q10.What change or improvements would you like to see in the telemedicine policy landscape in

Pakistan ?

Q11.How has the COVID-19 pandemic influenced the adoption of telemedicine in Pakistan, and what I

Version 1.1

impact do you anticipate it having on future telemedicine policies in the country?

Q12.What are the key challenges that have emerged for telemedicine during the pandemic in Pakistan,

and what measures you think should be considered to address these challenges in future policy

development?

Q13.In your opinion, what lessons have been learned from the pandemic regarding telemedicine, and

how can these lessons be incorporated into the development of telemedicine policies in Pakistan?

Version 1.1

## **Part 2. INTERVIEW GUIDE FOR HEALTH POLICY MAKER FOR DECISION SUPPORT SYSTEM**

1. What policies have you developed or implemented to improve telemedicine services in Pakistan?
2. What are the challenges you have faced in implementing these policies?
3. How do you involve stakeholders in the policy development process?
4. How do you ensure that the policies are in line with current healthcare needs of the population?
5. How familiar are you with digital decision support systems (DDSS) used in healthcare in Pakistan?
6. In your opinion, what are the potential benefits of implementing digital decision support systems in the Pakistani healthcare system?
7. Are there any specific challenges or barriers that you foresee in the widespread adoption and use of digital decision support systems in healthcare in Pakistan?
8. How do you believe digital decision support systems can contribute to evidence-based policy making in the healthcare sector of Pakistan?
9. What role do you see digital decision support systems playing in improving healthcare outcomes and patient safety in Pakistan?
10. Are there any concerns or considerations regarding the integration and interoperability of digital decision support systems with existing healthcare systems and infrastructure in Pakistan?

## Version 1.1

11. From a policy-making perspective, what measures should be taken to ensure the ethical use of data and protection of patient privacy in the context of digital decision support systems in Pakistan?
12. In your opinion, what strategies or incentives can be implemented to encourage healthcare providers and institutions in Pakistan to adopt and effectively utilize digital decision support systems?
13. How can the government and policymakers facilitate the implementation and use of digital decision support systems in healthcare across different regions of Pakistan?
14. Are there any specific policy guidelines or regulations that need to be in place to govern the use of digital decision support systems in healthcare in Pakistan?
15. In your view, what role should healthcare professionals, such as doctors and nurses, play in the design, development, and implementation of digital decision support systems in Pakistan?
16. What is your vision for the future of digital decision support systems in healthcare policy making in Pakistan, and what steps should be taken to realize that vision?
