# Supplementary material
Source: HighWire-hosted journal article supplement (https://bmjopen.bmj.com/content/14/9/e082167)
Supplement: inline-supplementary-material-5 [file inline-supplementary-material-5.pdf]

Version 1.1

## QUALITATIVE INTERVIEW GUIDE FOR DIGITAL DECISION SUPPORT SYSTEM FOR TECHNICAL REVIEW

| Questions                                                                                                                                              | Probes                                                                                        |
|--------------------------------------------------------------------------------------------------------------------------------------------------------|-----------------------------------------------------------------------------------------------|
| 1. What are the sources of data for the DDSS?                                                                                                          | - Standard procedures, Compliance protocol                                                    |
| 2. How do you make sure data compliance is implemented?                                                                                                | - Standard procedures, Compliance protocol                                                    |
| 3. How do you manage data quality?                                                                                                                     | - Standard procedures, Compliance protocol                                                    |
| 4. How is electronic health records used in DDSS?                                                                                                      | - Data integration, Disease Coding criteria, Number of data systems                           |
| 5. How are Clinical guidelines used in DDSS?                                                                                                           | - Local guide (Pakistan), Global Guide                                                        |
| 6. How does integration with existing system occur?                                                                                                    | - Electronic Health Record (EHR) integration, Hospital Information System (HIS) compatibility |
| 7. How do you assess user acceptability?                                                                                                               | - User interface design, Workflow impact assessment                                           |
| 8. How do you assess Accuracy and Reliability of DDSS?                                                                                                 | - Algorithm performance evaluation, Validation studies                                        |
| 9. How do you plan to scale the system? Can it handle increasing numbers of users or expanding medical knowledge without compromising its performance? | - Infrastructure capacity planning, Modular architecture design                               |
| 10. How do you manage data privacy and security?                                                                                                       | - Data encryption methods, Access control mechanisms                                          |
| 11. How do you manage Regulatory Compliance?                                                                                                           | - HIPAA compliance (US), GDPR compliance (EU)                                                 |
