# Supplementary material
Source: HighWire-hosted journal article supplement (https://bmjopen.bmj.com/content/14/9/e082167)
Supplement: inline-supplementary-material-7 [file inline-supplementary-material-7.pdf]

**Study team:**

The Group brings together researchers with multidisciplinary skills and expertise across diverse backgrounds, including Health System and Policy Research, Monitoring and evaluation of Health Programmes and Digital Health. Group members have received grants from the Bill & Melinda Gates Foundation, DFID-MRC, DFID-British Council, Grand Challenges Canada, NORAD, GAVI, UNICEF, the World Bank, WHO, and others. The Aga Khan University has strong links with the government and health department. More precisely, individuals representing patient and public involvement actively participate as integral members of the team. They regularly attend research meetings and public events to offer their valuable input. Additionally, they have played a pivotal role in shaping research inquiries and will contribute to the data analysis process by pinpointing existing deficiencies in healthcare practices from the standpoint of patients.
